# Supplementary material
Source: PubMed Central journal article supplement (PMC1475451)
Supplement: plntphys_pp.106.079293_2.pdf [file plntphys_pp.106.079293_2.pdf]

## Figure S2

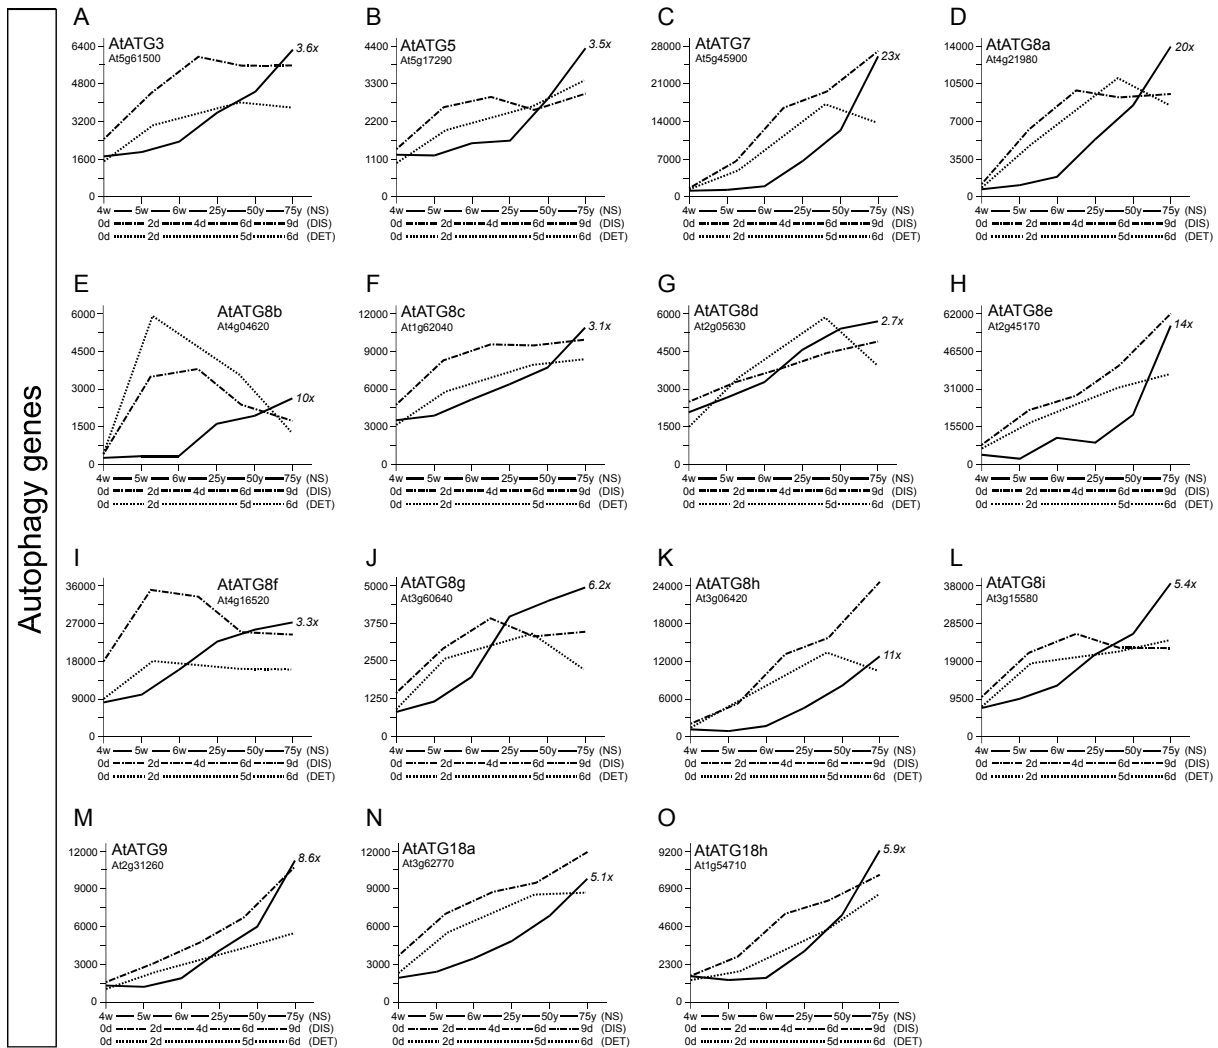

**Figure S2:** Autophagy genes

The expression profiles of 15 senescence-associated autophagy genes are shown. The averages of the normalized signal values (see Materials and Methods) were plotted against the sampling time points. The time scale of the x-axis is not linear and different for the NS, DIS and DET senescence experiments. For the developmental senescence (NS) curve the signal ratio between the last sampling time point (75y; see Table I) and the 4 weeks old reference sample (4w/0d) is indicated.
