# Supplementary material
Source: PubMed Central journal article supplement (PMC1475451)
Supplement: plntphys_pp.106.079293_3.pdf [file plntphys_pp.106.079293_3.pdf]

# Figure S3

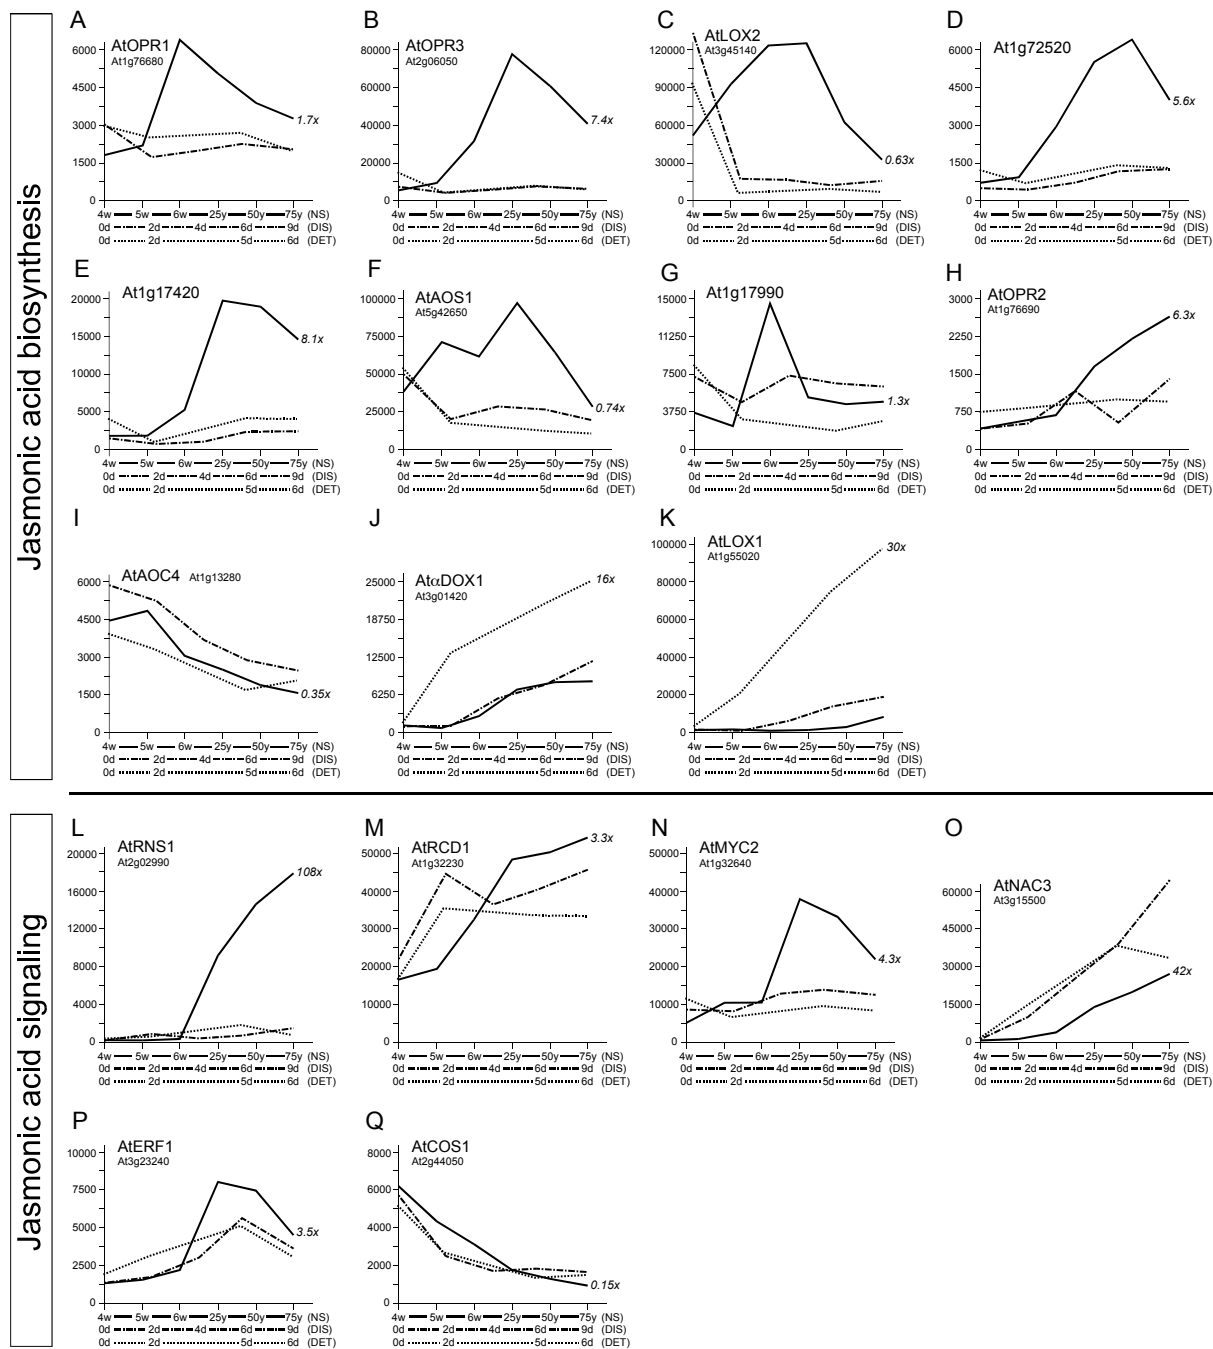

**Figure S3: Jasmonic acid (JA) genes**

The expression profiles of 11 senescence-associated JA biosynthesis and six JA signaling genes are shown. The data were processed as described for Figure S2.
