# Supplementary material
Source: PubMed Central journal article supplement (PMC1475451)
Supplement: plntphys_pp.106.079293_4.pdf [file plntphys_pp.106.079293_4.pdf]

## Figure S4

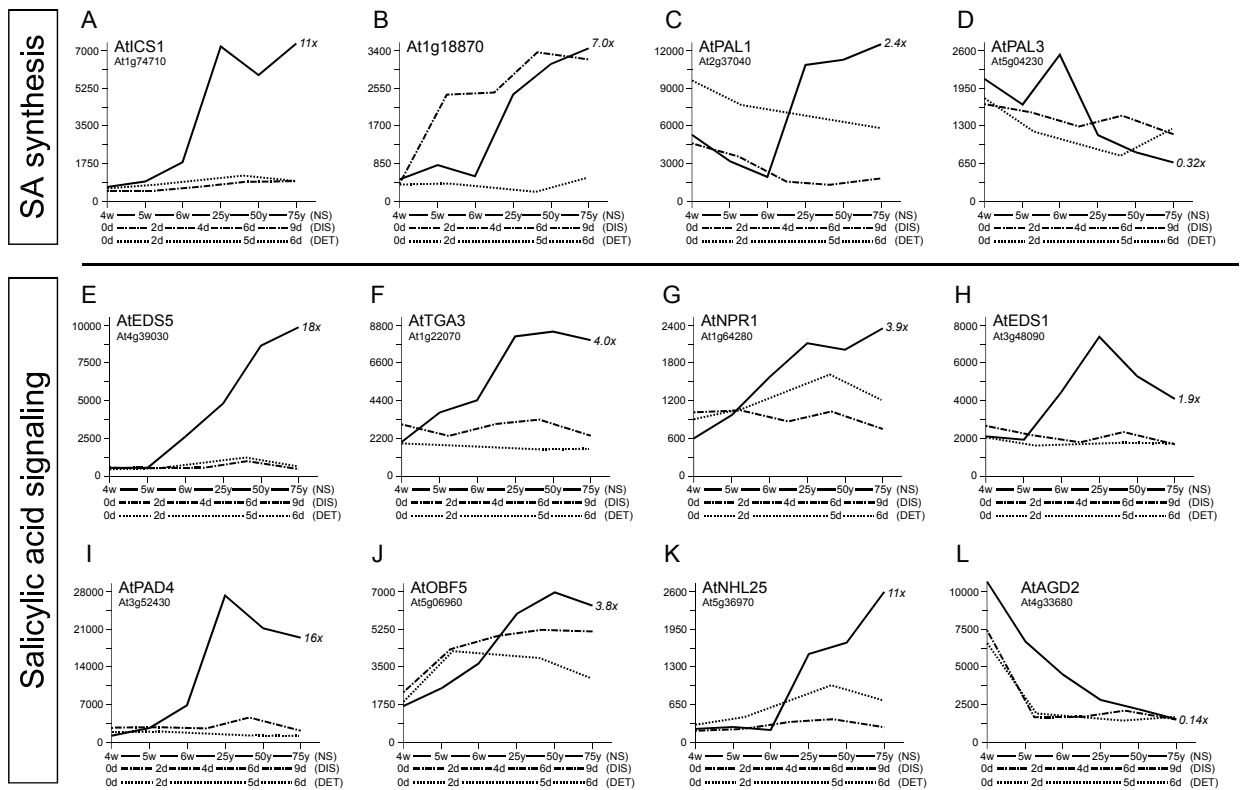

**Figure S4:** Salicylic acid (SA) genes

The expression profiles of senescence-associated SA biosynthesis and signaling genes are shown. The data were processed as described for Figure S2.
