# Supplementary material
Source: PubMed Central journal article supplement (PMC1475451)
Supplement: plntphys_pp.106.079293_6.pdf [file plntphys_pp.106.079293_6.pdf]

Figure S6

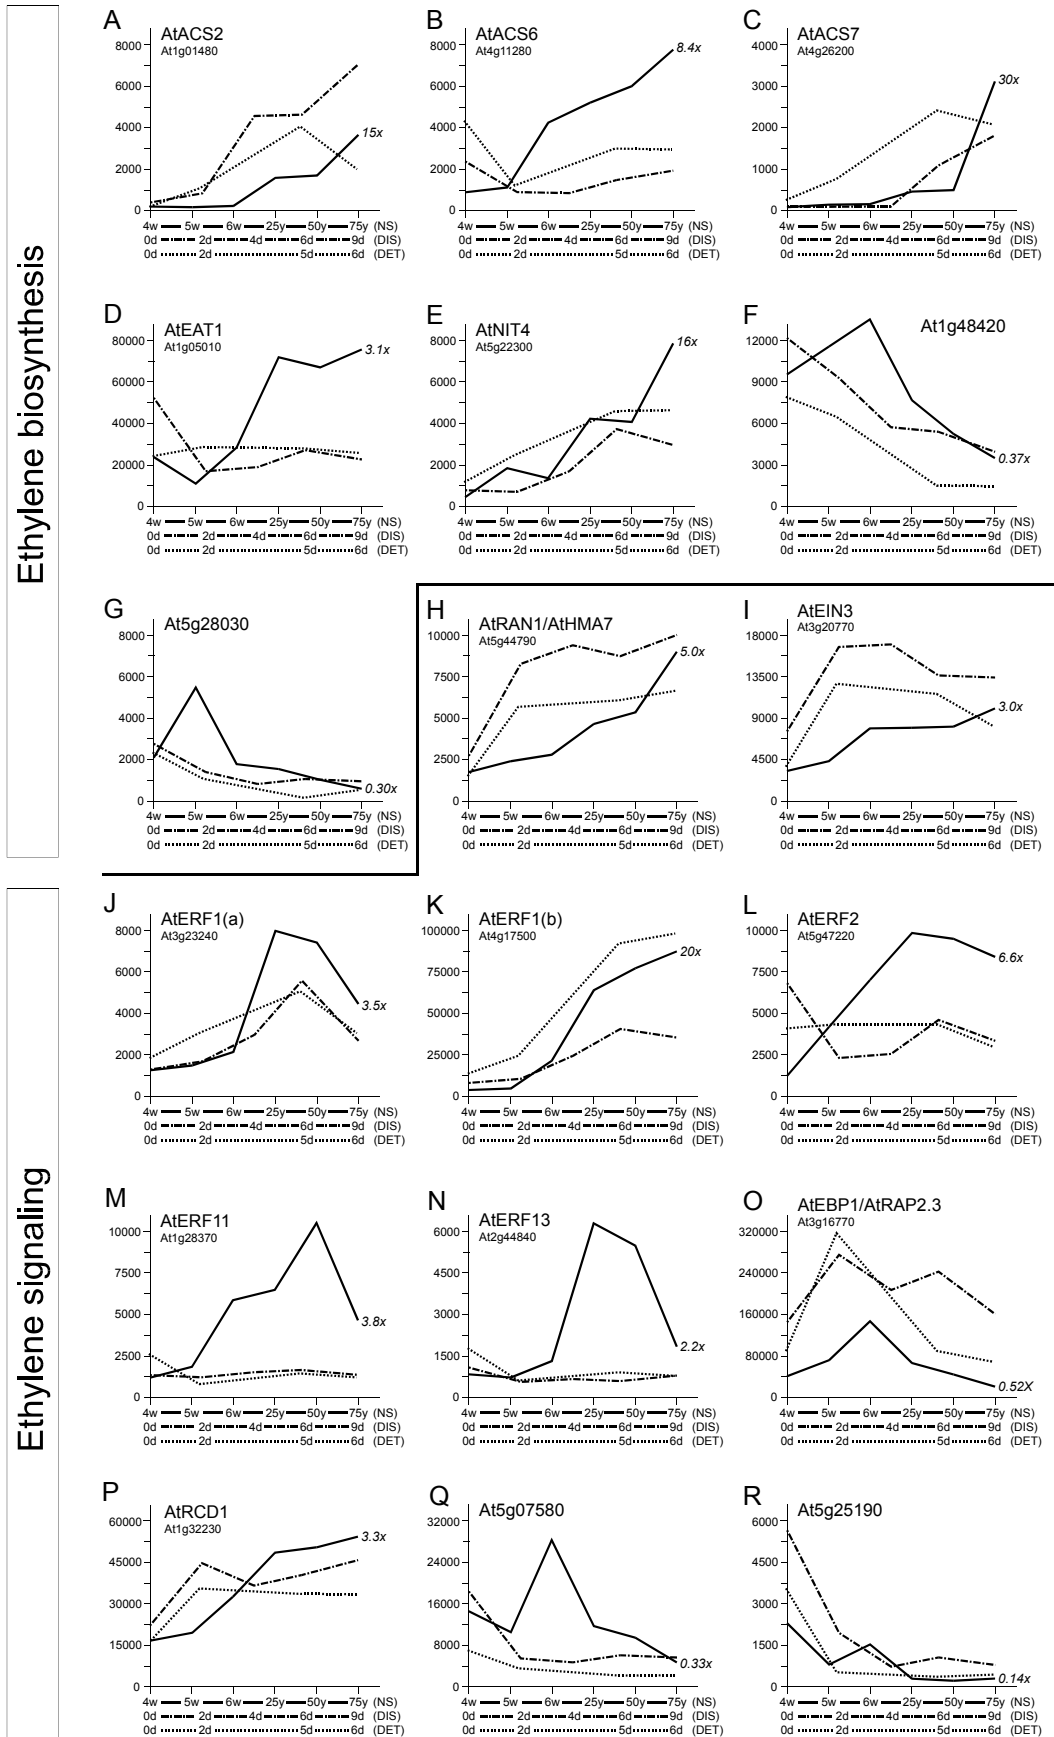

**Figure S6:** Ethylene related genes. The expression profiles of seven senescence-associated ethylene biosynthesis and 11 ethylene signaling genes are shown. The data were processed as described for Figure S2.
