# Supplementary material
Source: PubMed Central journal article supplement (PMC1475451)

# Figure S7

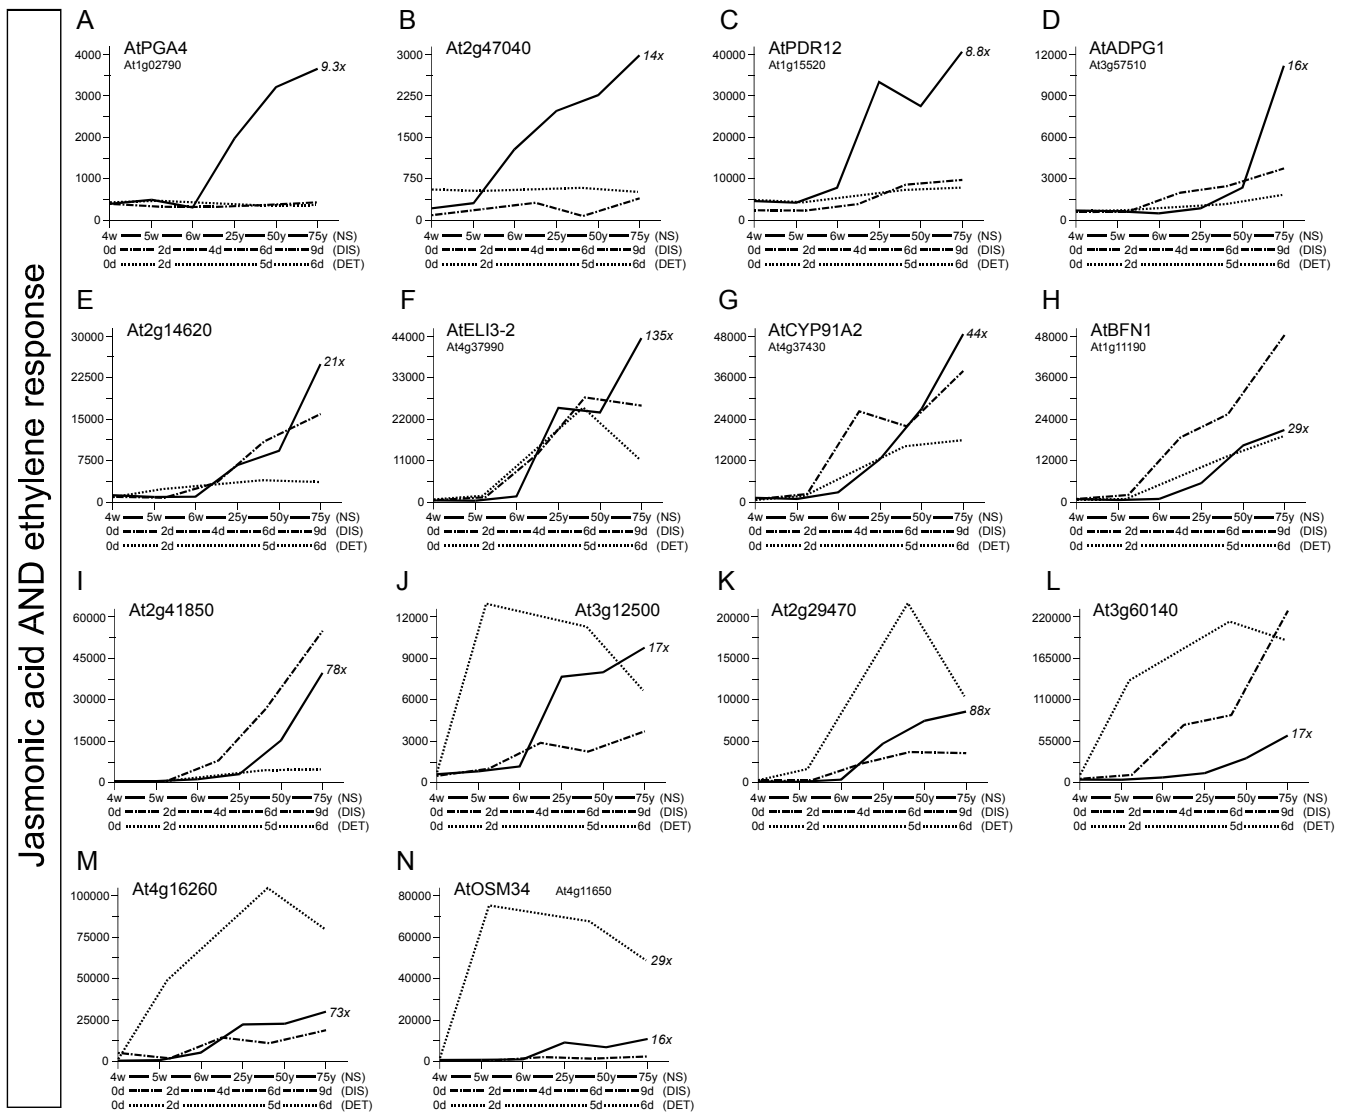

**Figure S7:** Jasmonic acid (JA) and ethylene responsive genes.

The expression profiles of 11 senescence-associated JA biosynthesis and six JA signaling genes are shown. The data were processed as described for Figure S2.

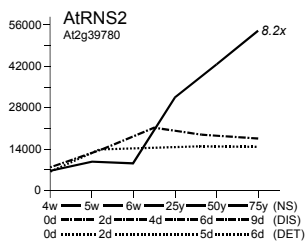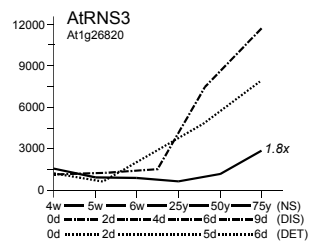

Supplement: plntphys_pp.106.079293_7.pdf [file plntphys_pp.106.079293_7.pdf]
