# Supplementary material
Source: PubMed Central journal article supplement (PMC1475451)
Supplement: plntphys_pp.106.079293_8.pdf [file plntphys_pp.106.079293_8.pdf]

# Figure S8

van der Graaff et al. - Arabidopsis natural and induced senescence transcriptome

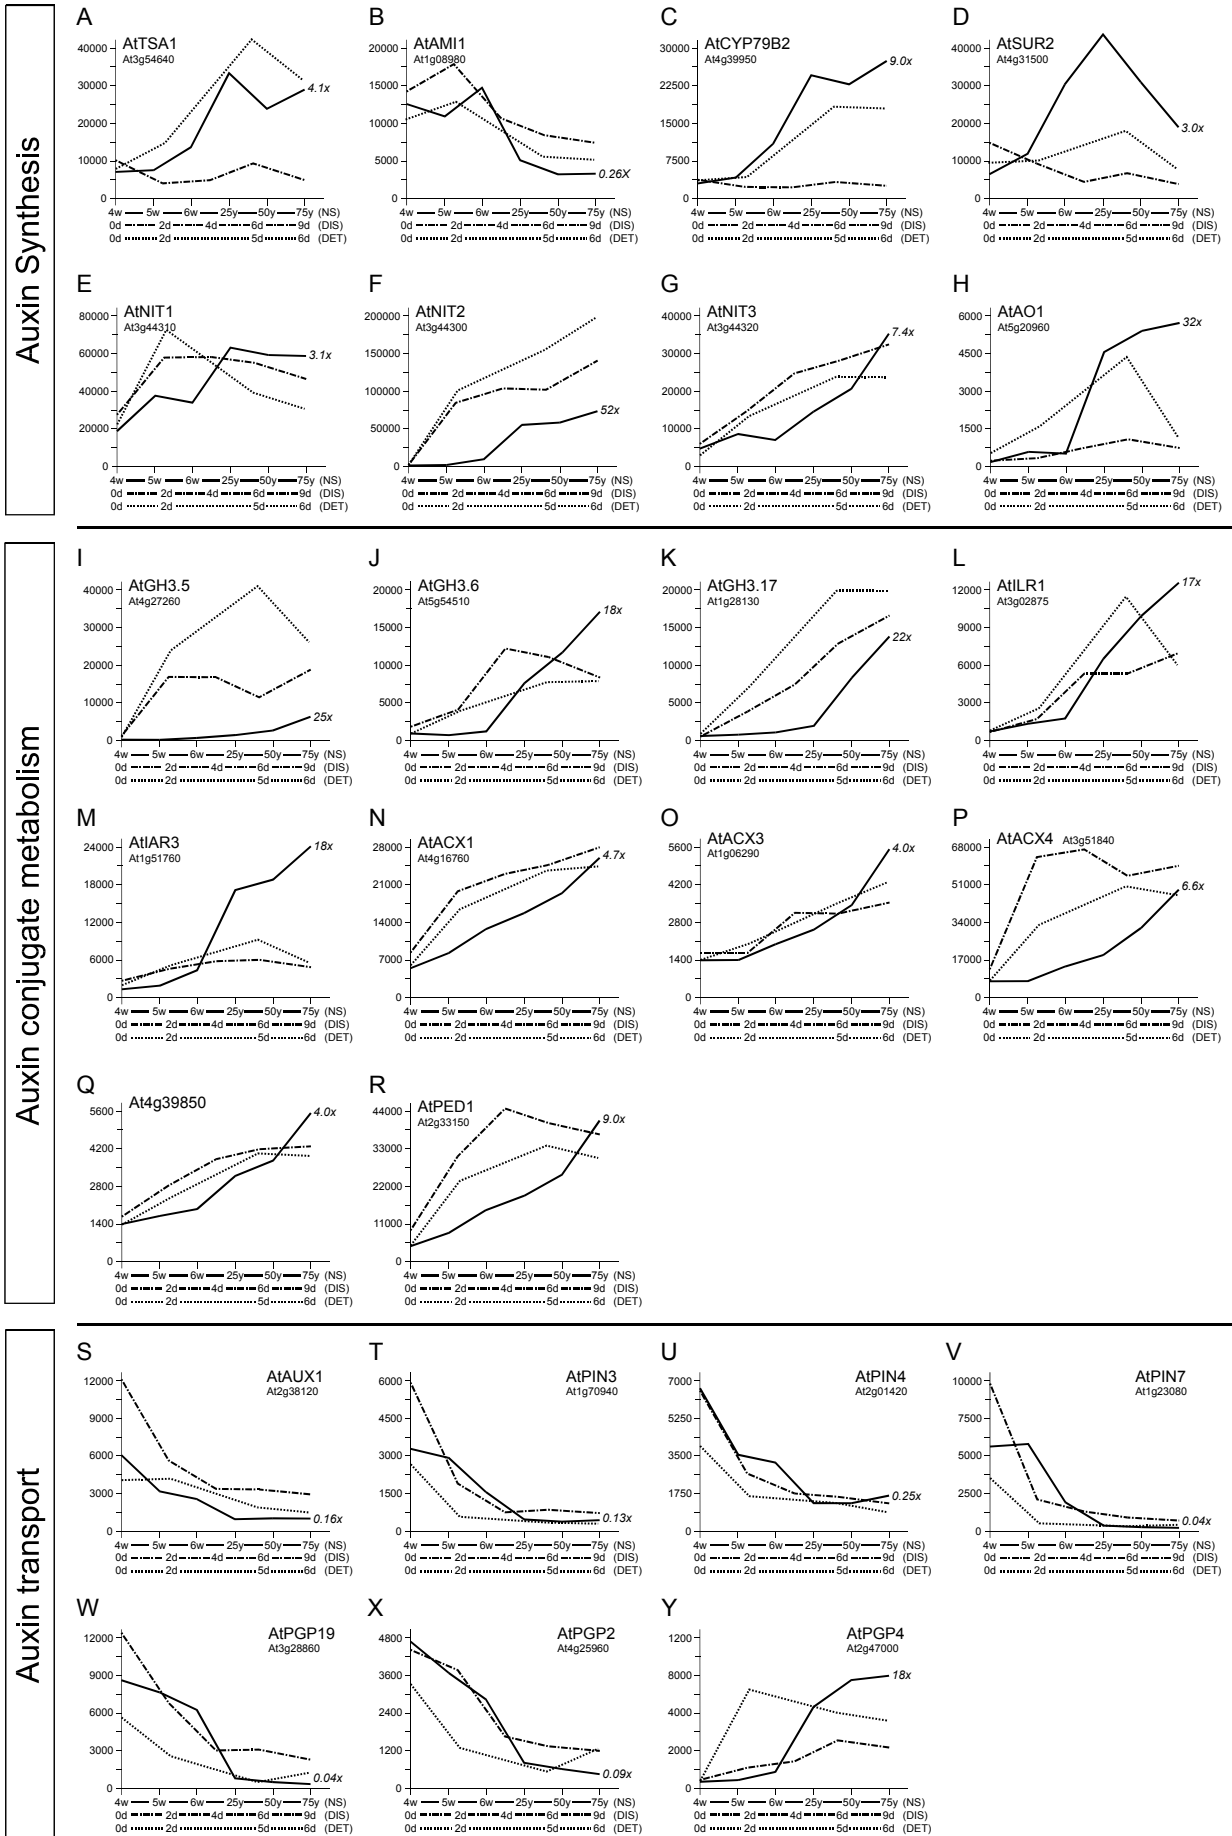

**Figure S8:** Auxin (IAA) genes. The expression profiles of senescence-associated auxin biosynthesis, conjugate metabolism and transporter genes are shown. The data were processed as described for Figure S2.
