# Supplementary material
Source: PubMed Central journal article supplement (PMC1475451)
Supplement: plntphys_pp.106.079293_9.pdf [file plntphys_pp.106.079293_9.pdf]

## Figure S9

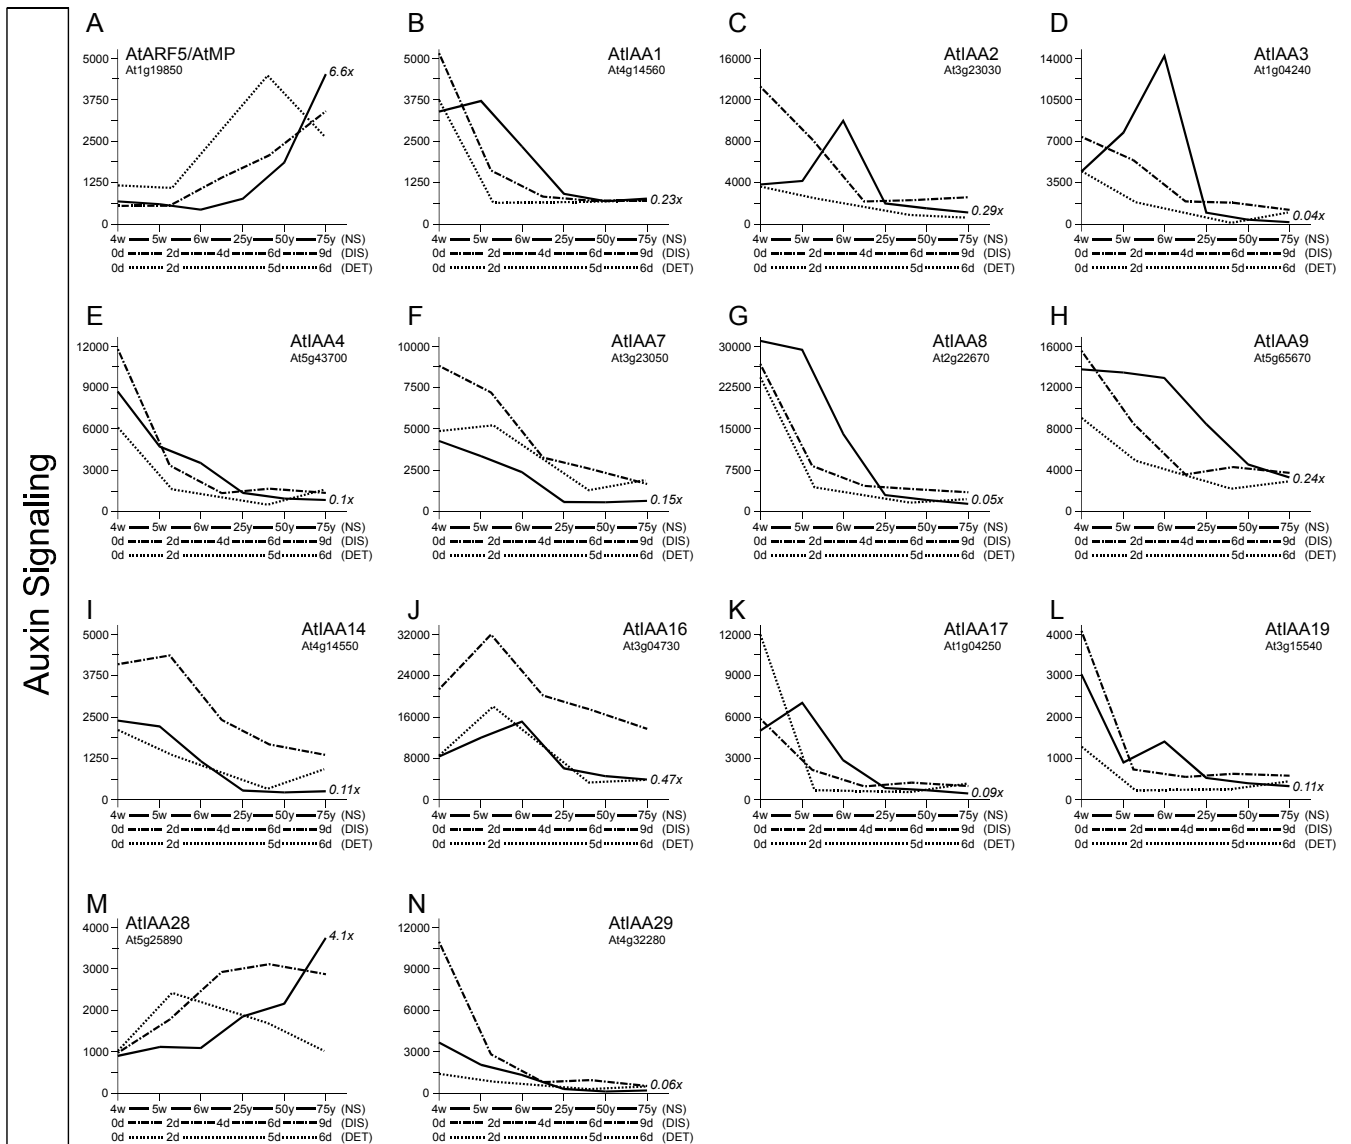

**Figure S9:** Auxin (IAA) signaling genes.

The expression profiles of 14 senescence-associated auxin signaling genes are shown. The data were processed as described for Figure S2.
