# Supplementary material
Source: PubMed Central journal article supplement (PMC1475451)
Supplement: plntphys_pp.106.079293_10.pdf [file plntphys_pp.106.079293_10.pdf]

# Figure S10

van der Graaff et al. - Arabidopsis natural and induced senescence transcriptome

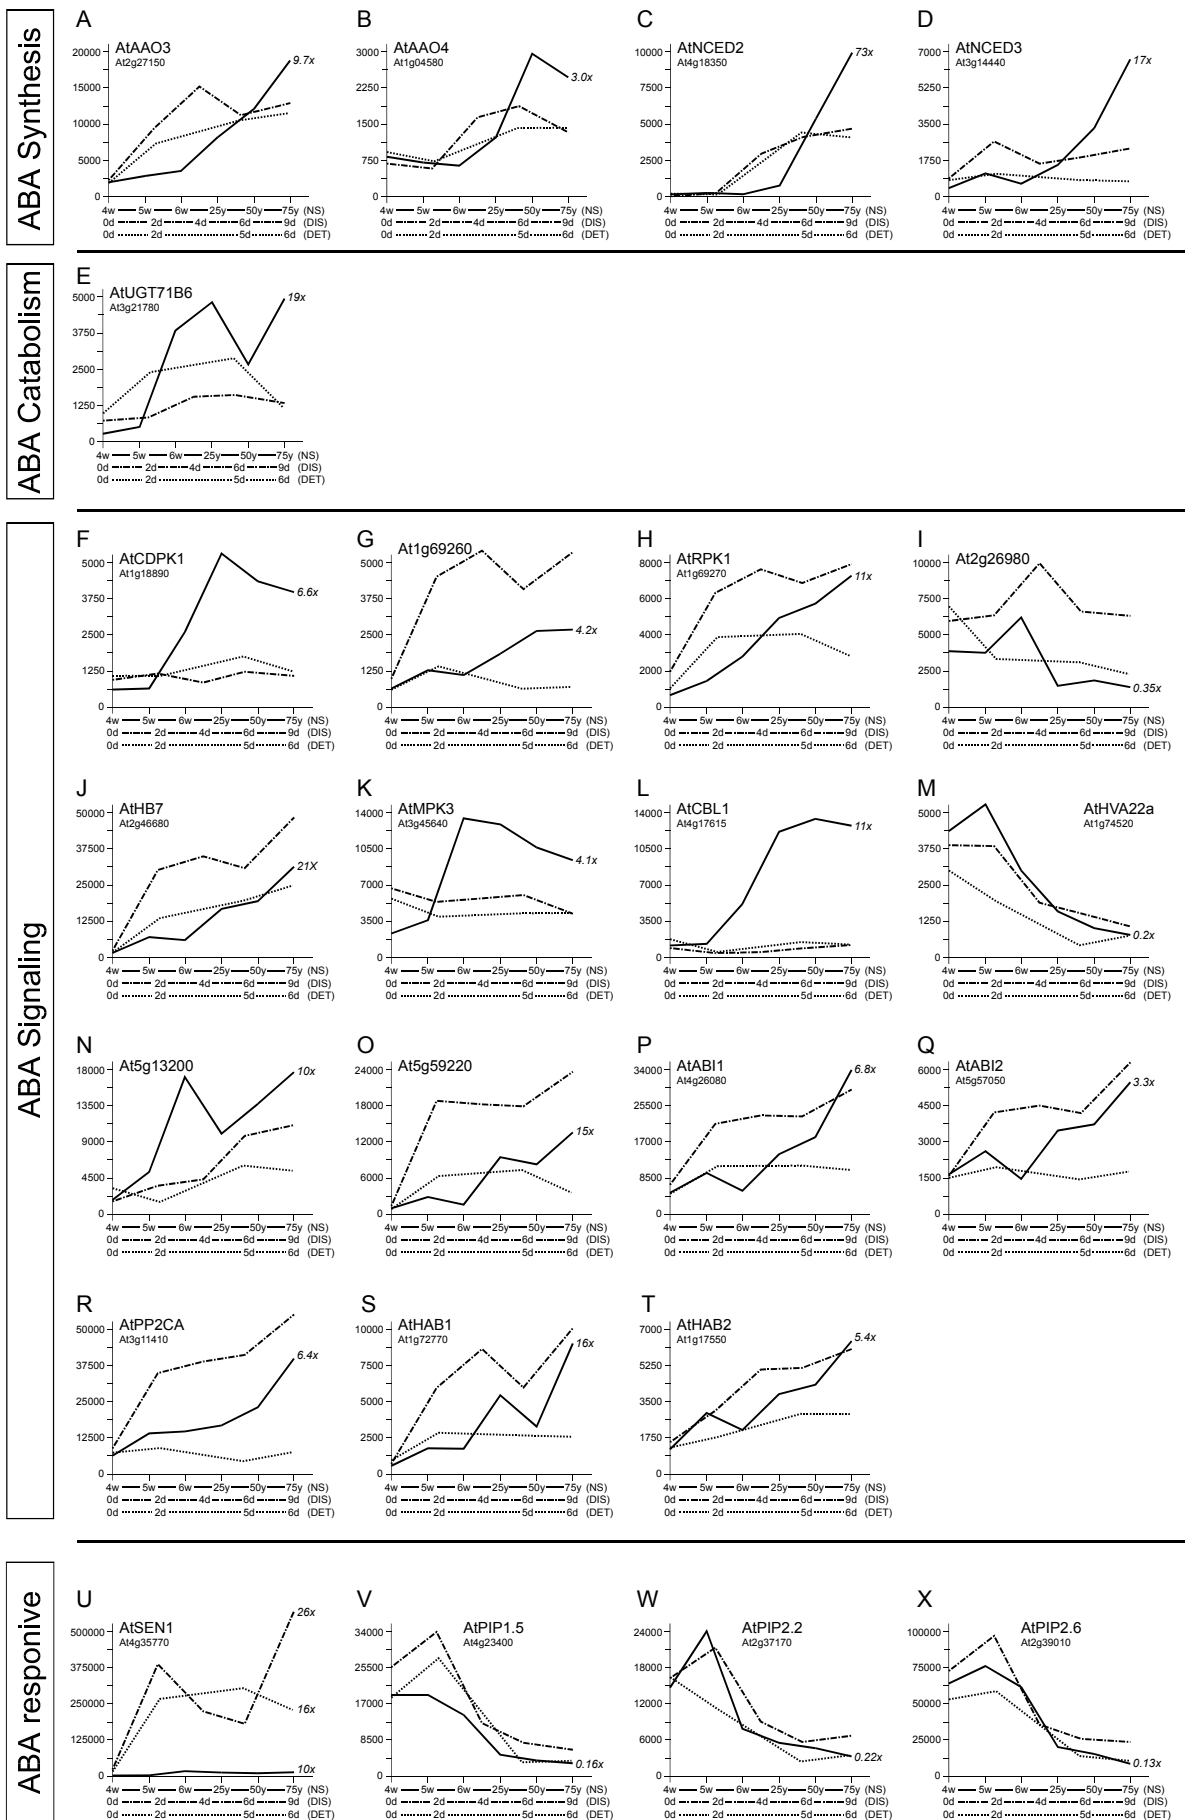

**Figure S10:** Abscisic acid (ABA) related genes. The expression profiles of senescence-associated ABA biosynthesis, catabolism, signaling and responsive genes are shown. The data were processed as described for Figure S2.
