# Supplementary material
Source: PubMed Central journal article supplement (PMC1475451)

# Figure S5

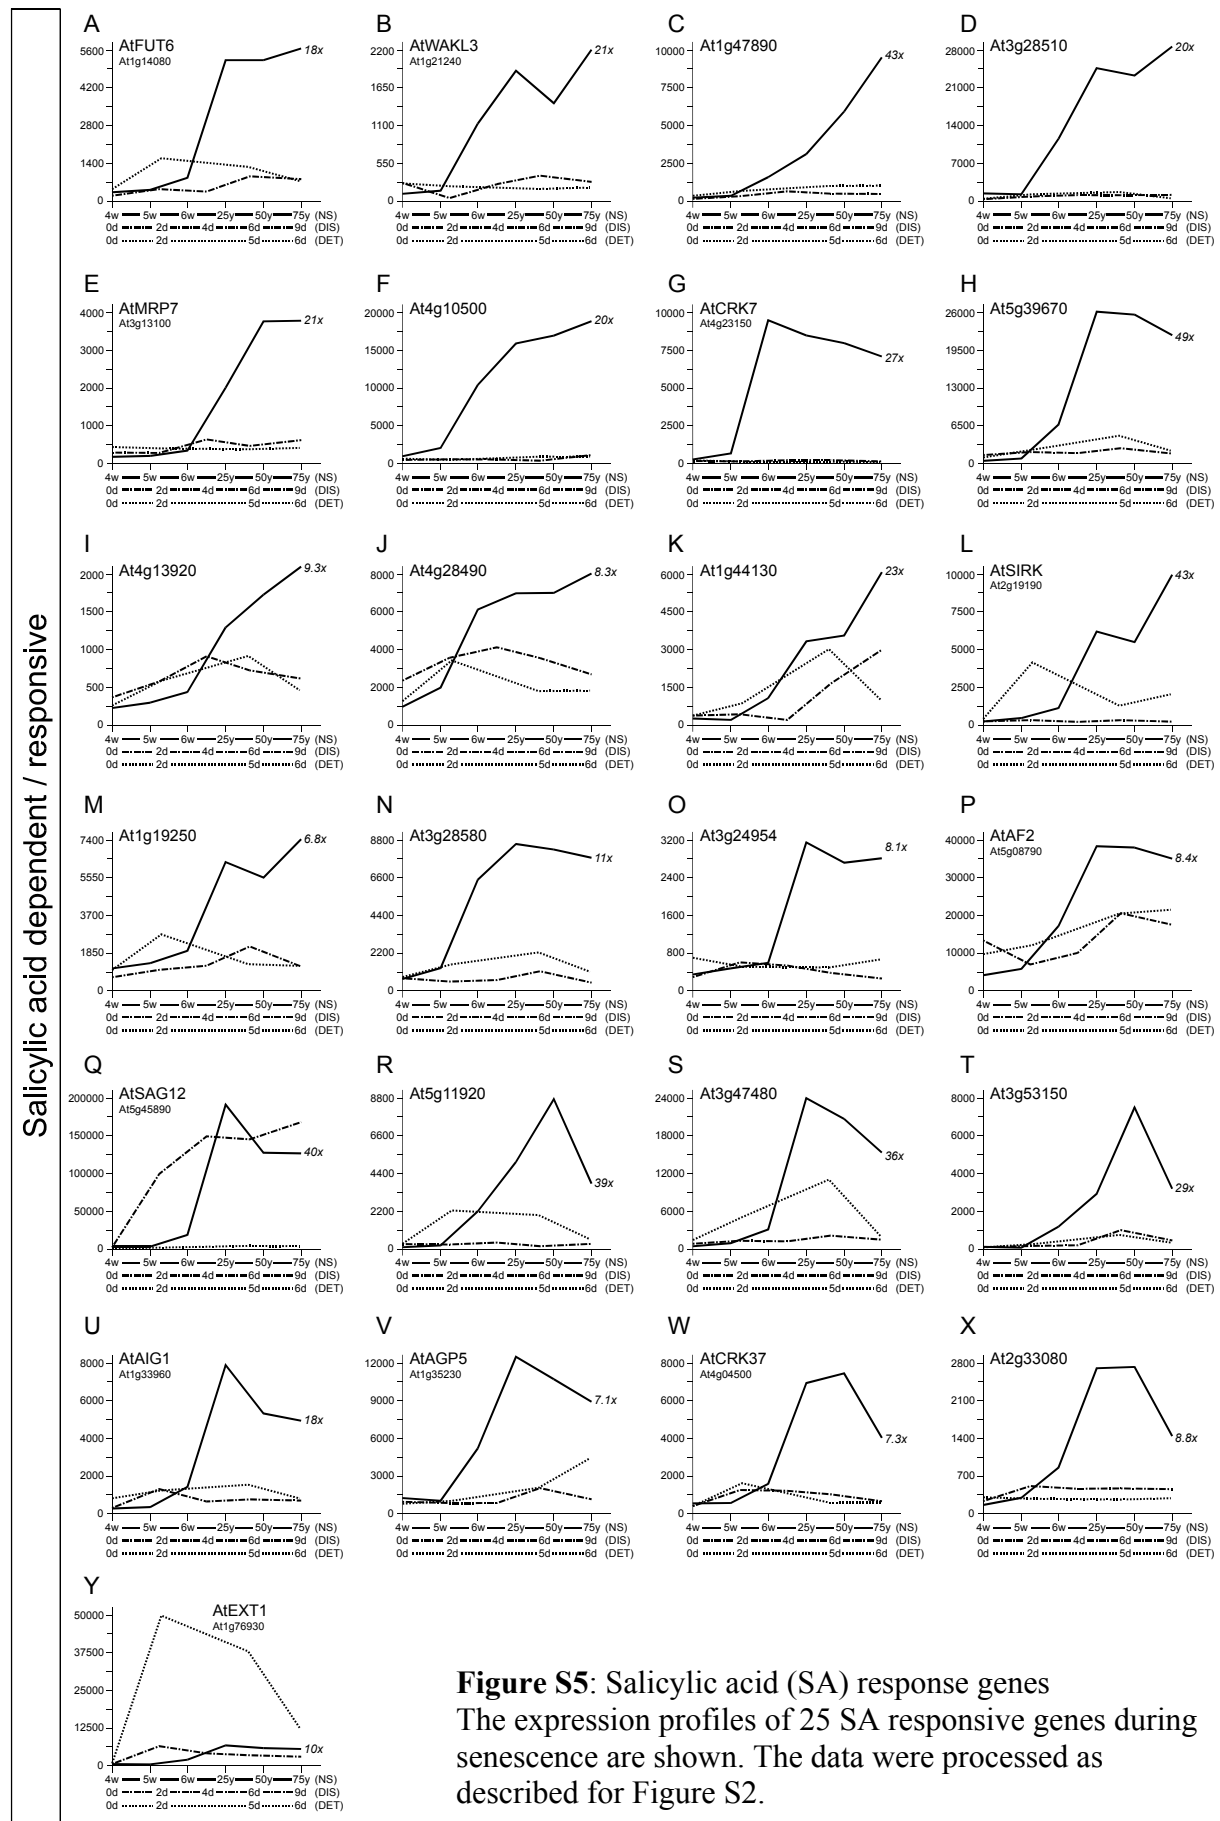

Supplement: plntphys_pp.106.079293_5.pdf [file plntphys_pp.106.079293_5.pdf]
